# Supplementary material for: CO2activation of bamboo residue after hydrothermal treatment and performance as an EDLC electrode
Source: Royal Society of Chemistry journal article supplement (doi:10.1039/d1ra00124h), 2021-01-01
Supplement: d1ra00124h1.pdf [file d1ra00124h1.pdf]

**Table S1:** The *b*-values of the electrode samples

| Sample                            | Apparent Density (g cm <sup>-3</sup> ) | Electrode density (g cm <sup>-3</sup> ) |
|-----------------------------------|----------------------------------------|-----------------------------------------|
| B-800-15'                         | 0.654                                  | 0.514                                   |
| R-800-0h                          | 0.542                                  | 0.466                                   |
| R-800-1h                          | 0.627                                  | 0.517                                   |
| R-800-2h                          | 0.663                                  | 0.524                                   |
| R-800-3h                          | 0.540                                  | 0.434                                   |
| R-800-4h                          | 0.500                                  | 0.379                                   |
| R-750-6h                          | 0.535                                  | 0.471                                   |
| R-850-0.5h                        | 0.673                                  | 0.471                                   |
| R-900-1.5h                        | 0.560                                  | 0.399                                   |
| Commercial<br>Activated<br>carbon | 0.654                                  | 0.330                                   |

**Table S2:** The *b*-values of the electrode samples

| Sample     | <i>b</i> -value |
|------------|-----------------|
| B-800-15'  | 0.72            |
| R-800-0h   | 0.80            |
| R-800-1h   | 0.78            |
| R-800-2h   | 0.65            |
| R-800-3h   | 0.71            |
| R-800-4h   | 0.79            |
| R-750-6h   | 0.73            |
| R-850-0.5h | 0.71            |
| R-900-1.5h | 0.70            |

**Table S3:** The calculated capacitance, energy density and power density of electrode samples

| Electrode material       | Specific capacitance (F g <sup>-1</sup> ) | Current density (mA g <sup>-1</sup> ) | Energy density (Wh kg <sup>-1</sup> ) | Power density (W kg <sup>-1</sup> ) | Areal capacitance (F cm <sup>-2</sup> ) | Areal energy density (mWh cm <sup>-2</sup> ) | Areal power density (mW cm <sup>-2</sup> ) |
|--------------------------|-------------------------------------------|---------------------------------------|---------------------------------------|-------------------------------------|-----------------------------------------|----------------------------------------------|--------------------------------------------|
| B-800-15'                | 42.1                                      | 1000                                  | 2.1                                   | 179.0                               | 0.8                                     | 0.04                                         | 3.51                                       |
|                          | 127.3                                     | 10                                    | 6.4                                   | 2.4                                 | 2.65                                    | 0.12                                         | 0.05 μW cm <sup>-2</sup>                   |
| R-800-0h                 | 0.1                                       | 1000                                  | 6 mWh kg <sup>-1</sup>                | 75.6                                | 2 mF cm <sup>-2</sup>                   | 0.1 μWh cm <sup>-2</sup>                     | 1.48                                       |
|                          | 11.1                                      | 10                                    | 0.6                                   | 1.4                                 | 0.2                                     | 0.01                                         | 0.03 μW cm <sup>-2</sup>                   |
| R-800-1h                 | 1.6                                       | 1000                                  | 79 mWh kg <sup>-1</sup>               | 129.2                               | 30 mF cm <sup>-2</sup>                  | 2 μWh cm <sup>-2</sup>                       | 2.54                                       |
|                          | 25.0                                      | 10                                    | 1.3                                   | 2.1                                 | 0.5                                     | 0.02                                         | 0.04 μW cm <sup>-2</sup>                   |
| R-800-2h                 | 14.2                                      | 1000                                  | 0.7                                   | 133.5                               | 0.3                                     | 0.01                                         | 2.62                                       |
|                          | 123.6                                     | 10                                    | 6.2                                   | 2.7                                 | 2.5                                     | 0.12                                         | 0.05 μW cm <sup>-2</sup>                   |
| R-800-3h                 | 70.9                                      | 1000                                  | 3.5                                   | 250.3                               | 1.1                                     | 0.07                                         | 4.91                                       |
|                          | 115.2                                     | 10                                    | 5.8                                   | 2.6                                 | 1.9                                     | 0.11                                         | 0.05 μW cm <sup>-2</sup>                   |
| R-800-4h                 | 42.6                                      | 1000                                  | 2.1                                   | 190.5                               | 0.6                                     | 0.04                                         | 3.74                                       |
|                          | 118.1                                     | 10                                    | 5.9                                   | 2.5                                 | 1.8                                     | 0.12                                         | 0.05 μW cm <sup>-2</sup>                   |
| R-750-6h                 | 28.3                                      | 1000                                  | 1.4                                   | 163.8                               | 0.5                                     | 0.03                                         | 3.22                                       |
|                          | 117.2                                     | 10                                    | 5.9                                   | 2.7                                 | 1.9                                     | 0.11                                         | 0.05 μW cm <sup>-2</sup>                   |
| R-850-0.5h               | 13.4                                      | 1000                                  | 0.7                                   | 132.7                               | 0.3                                     | 0.01                                         | 2.60                                       |
|                          | 121.6                                     | 10                                    | 6.1                                   | 2.7                                 | 2.5                                     | 0.12                                         | 0.05 μW cm <sup>-2</sup>                   |
| R-900-1.5h               | 56.2                                      | 1000                                  | 2.8                                   | 188.3                               | 0.9                                     | 0.06                                         | 3.70                                       |
|                          | 156.7                                     | 10                                    | 7.8                                   | 2.7                                 | 2.6                                     | 0.15                                         | 0.05 μW cm <sup>-2</sup>                   |
| R-800-3h<br>2 electrodes | 37.0                                      | 1000                                  | 1.8                                   | 375.9                               | 0.6                                     | 0.03                                         | 5.97                                       |
|                          | 86.0                                      | 10                                    | 4.3                                   | 2.2                                 | 1.4                                     | 0.07                                         | 0.03 μW cm <sup>-2</sup>                   |

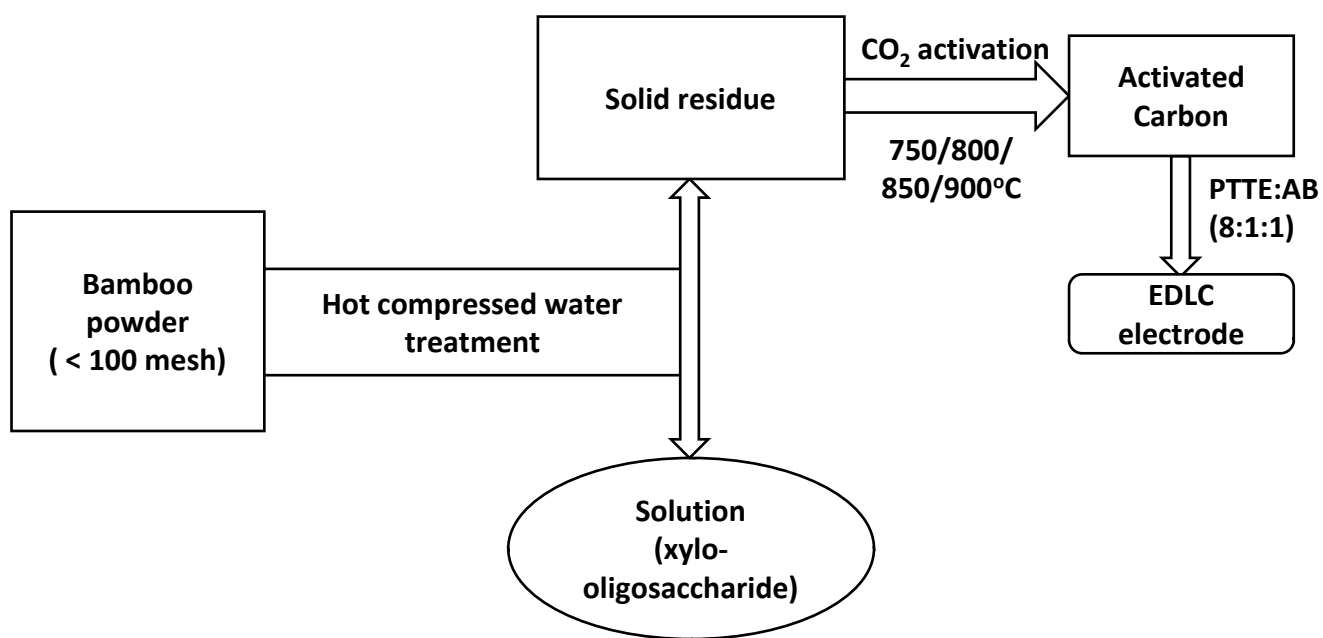

**Fig. S1** The schematic of the preparation process for making an EDLC electrode.

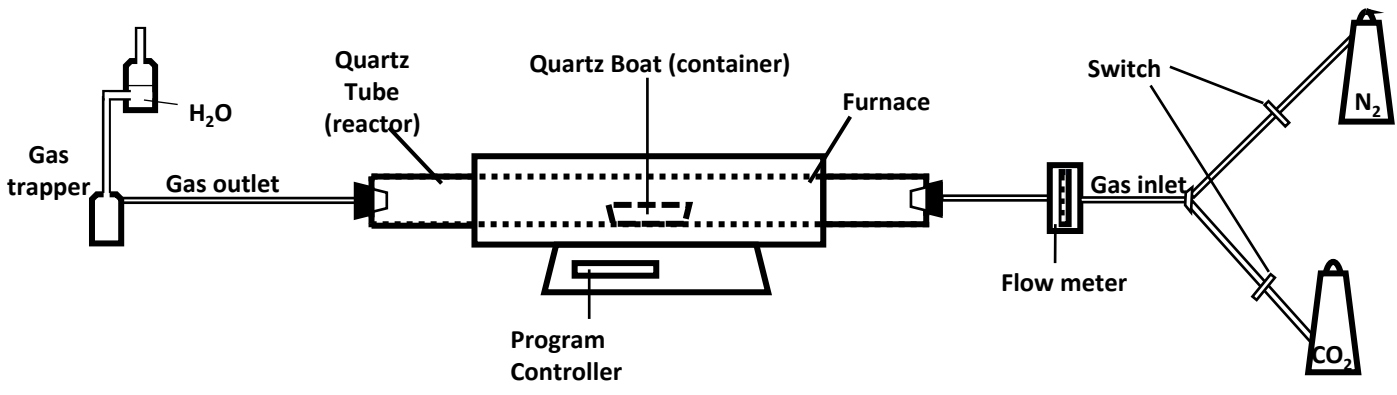

**Fig. S2** Technical Equipment for the Carbonization and Activation Process.

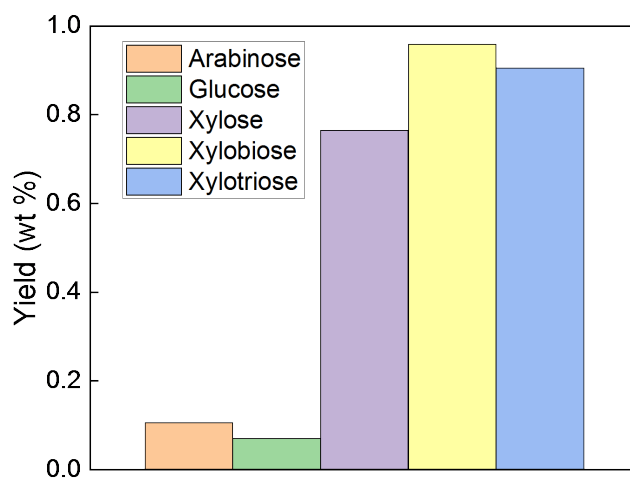

**Fig. S3** Saccharides in the solution (xylo-oligosaccharide).

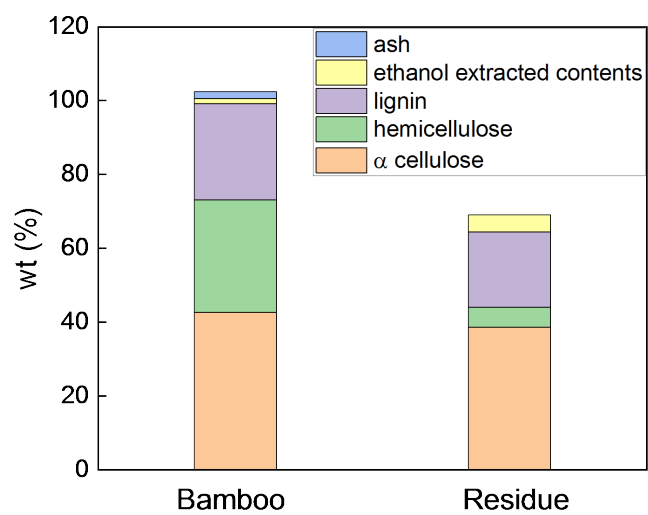

**Fig. S4** Percent ingredient in bamboo and residue.

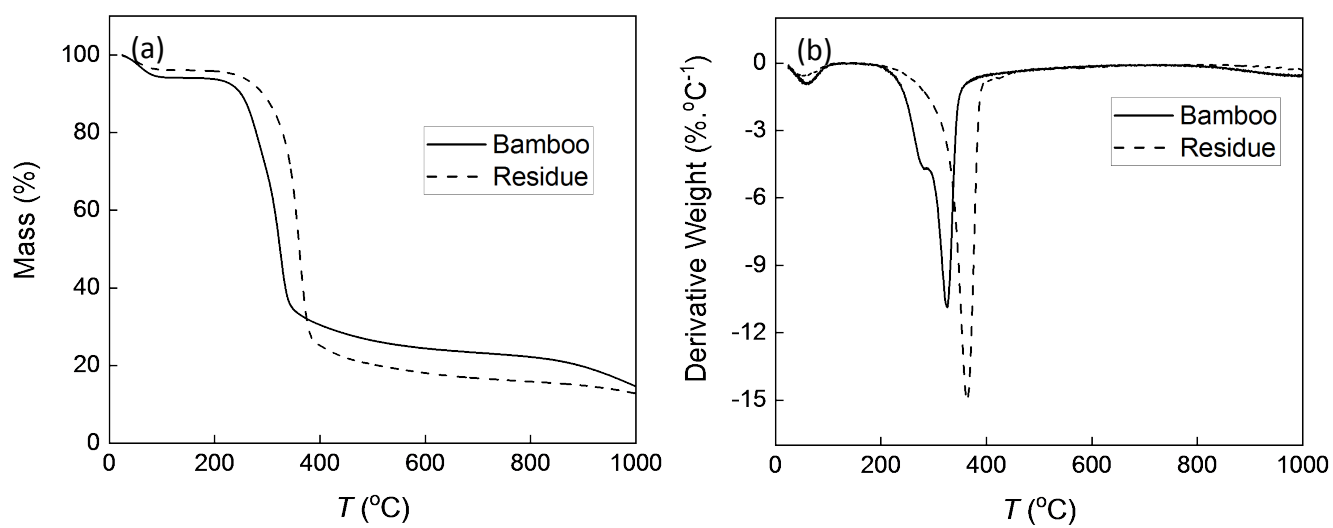

**Fig. S5 (a)** Thermal Gravimetric (TG) and **(b)** Derivative Thermogravimetric (DTG) analysis of the bamboo and residue.

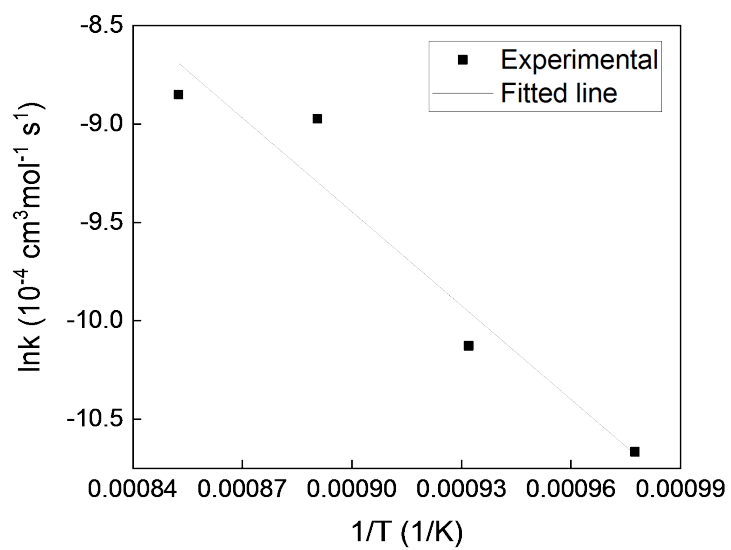

**Fig. S6** The Arrhenius plot based on the reaction rates of the solid residue at the different temperatures.



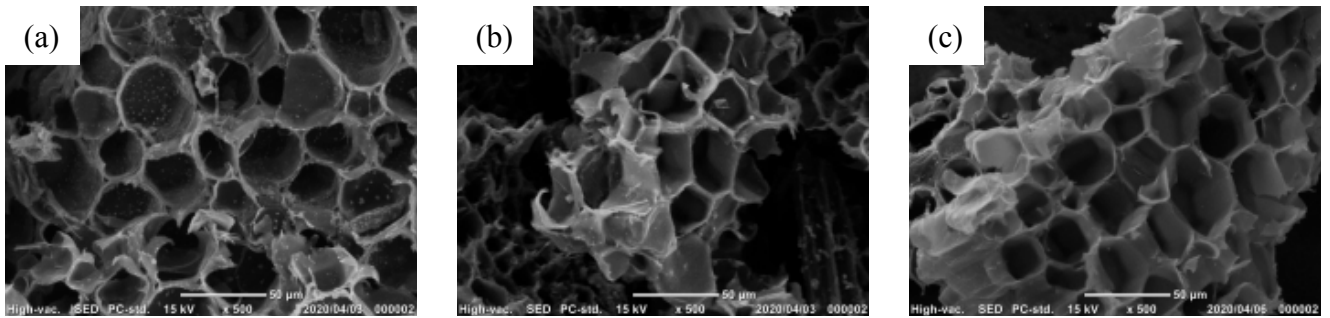

**Fig. S7** SEM images of the bamboo samples after CO<sub>2</sub> activation process **(a)** 0'; **(b)** 15'; **(c)** 30'.

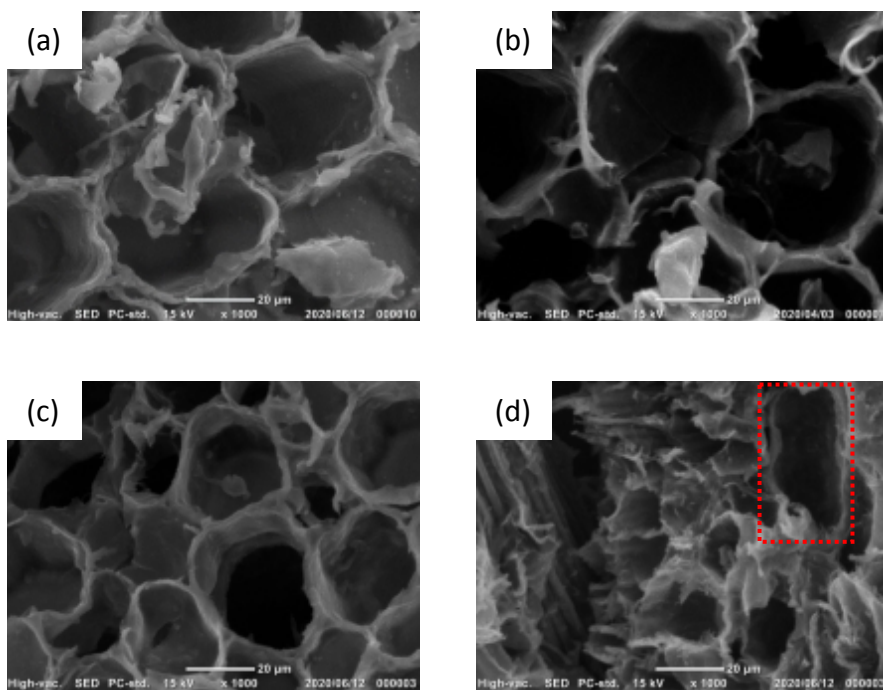

**Fig. S8** SEM images of the solid residue samples after carbonization process at different temperatures **(a)** 750°C; **(b)** 800°C; **(c)** 850°C; **(d)** 900°C.

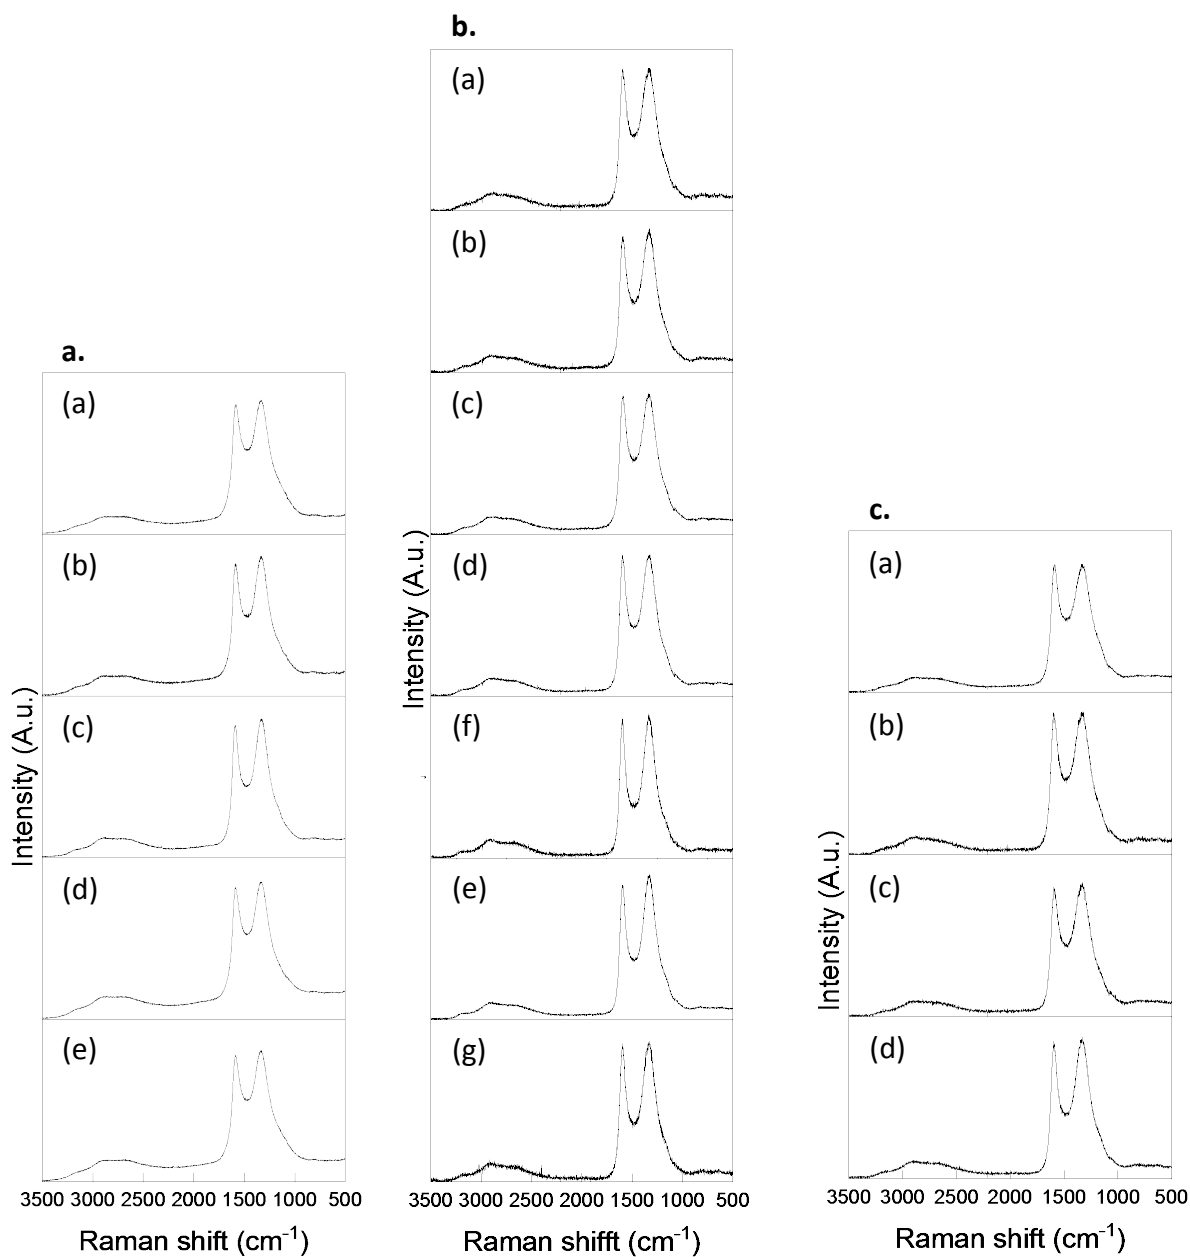

**Fig. S9** Raman spectra of **a.** the activated samples produced from bamboo at 800°C for (a) 0 minute, (b) 10 minutes, (c) 15 minutes, (d) 20 minutes, (e) 30 minutes; **b.** the activated samples produced from the solid residue at 800°C for (a) 0h, (b) 1h, (c) 2h, (d) 3h, (e) 4h, (f) 5h, (g) 6h; **c.** the carbonized samples produced from the solid residue at different temperatures (a) 750°C, (b) 800°C, (c) 850°C, (d) 900°C.

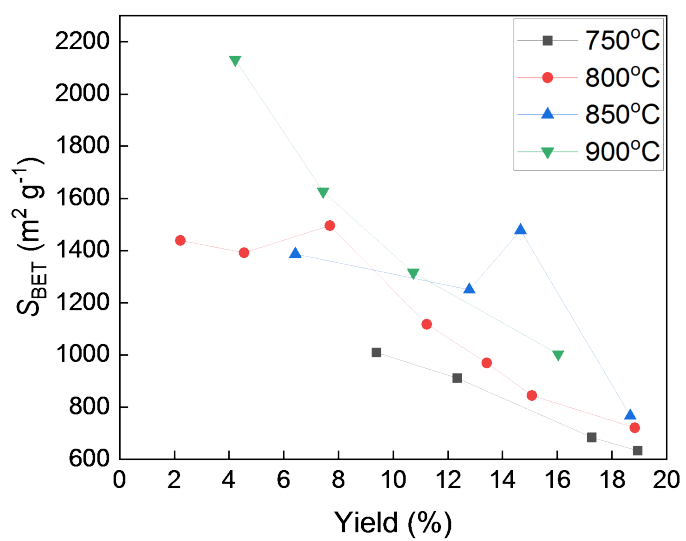

**Fig. S10** The BET specific area of the activated samples derived from the solid residue at different temperatures according to the yield.

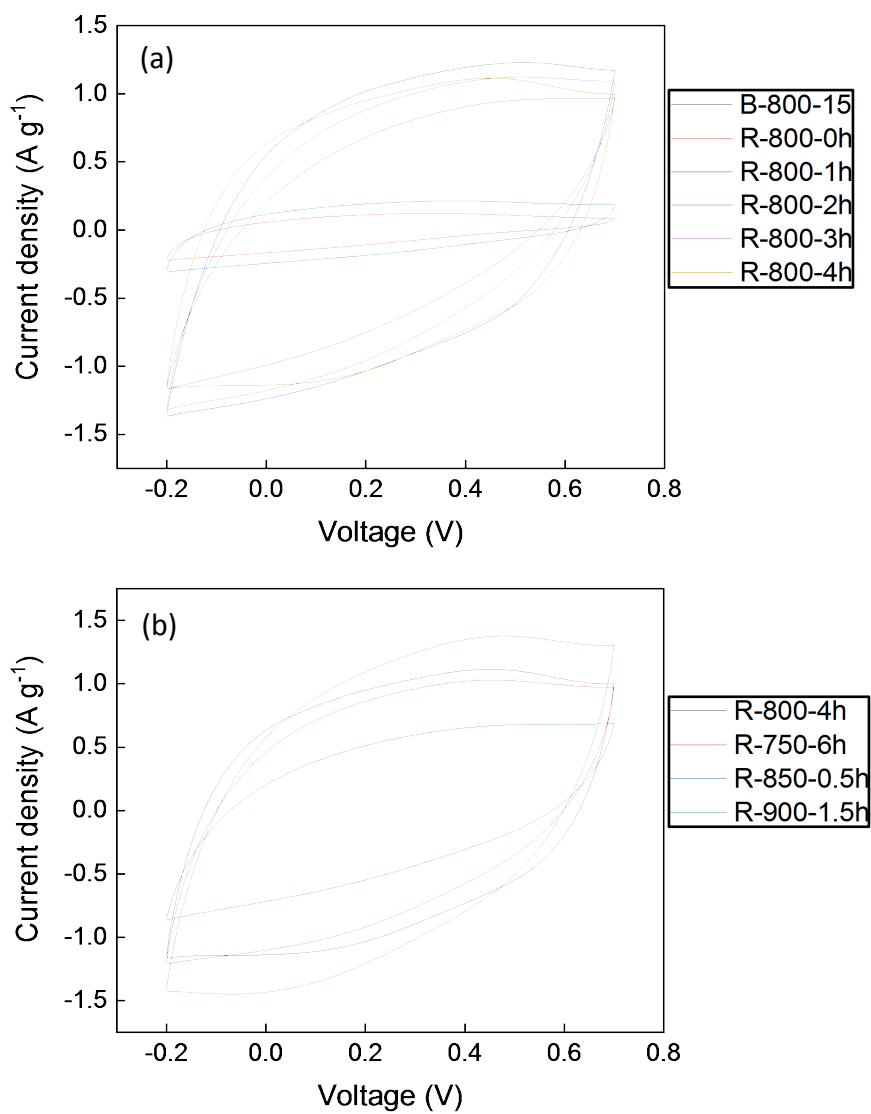

**Fig. S11** The CV curves measured at  $10\text{mV s}^{-1}$  of the samples **(a)** produced at  $800^\circ\text{C}$ ; **(b)** at different temperatures.

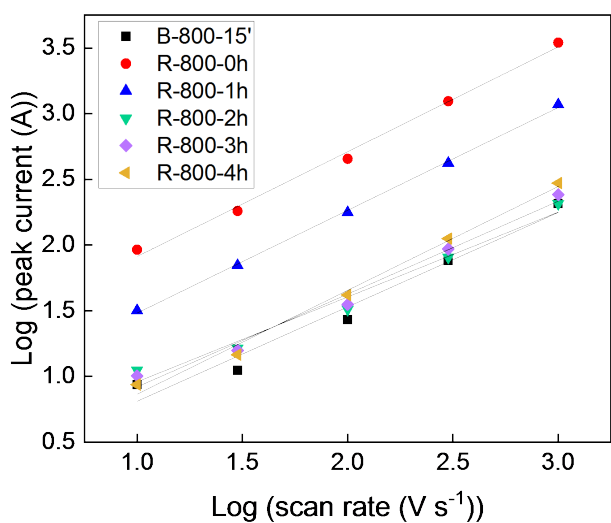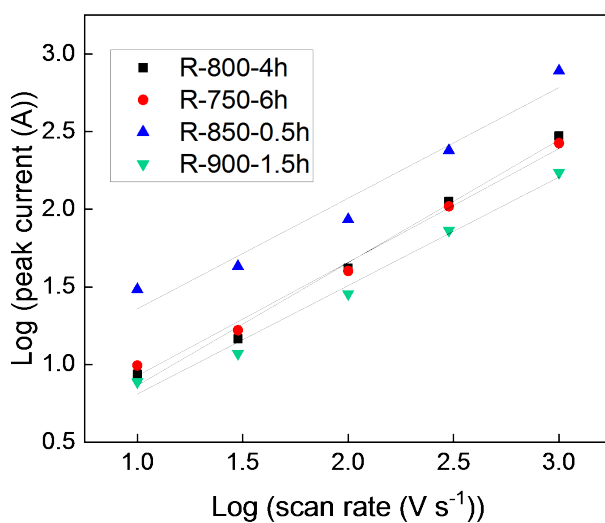

**Fig. S12** The log (*i*) versus log (*v*) plots **(a)** of the samples produced at 800°C; **(b)** of the solid residues activated at different temperatures

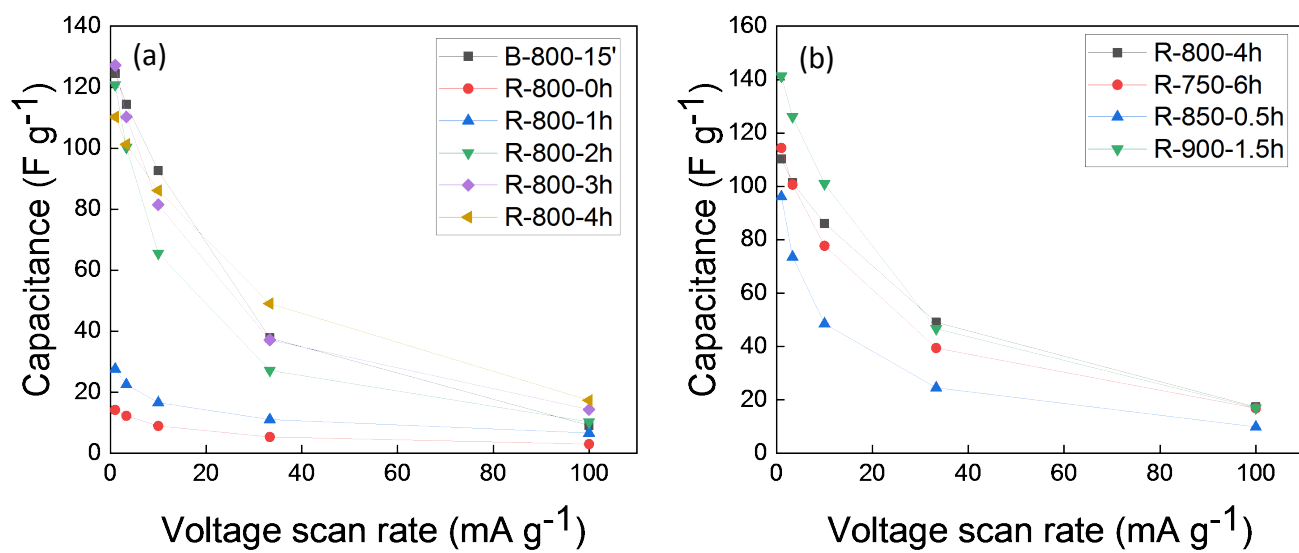

**Fig. S13** The capacitance values calculated from CV curves **(a)** of the samples produced at 800°C;

**(b)** of the solid residues activated at different temperatures

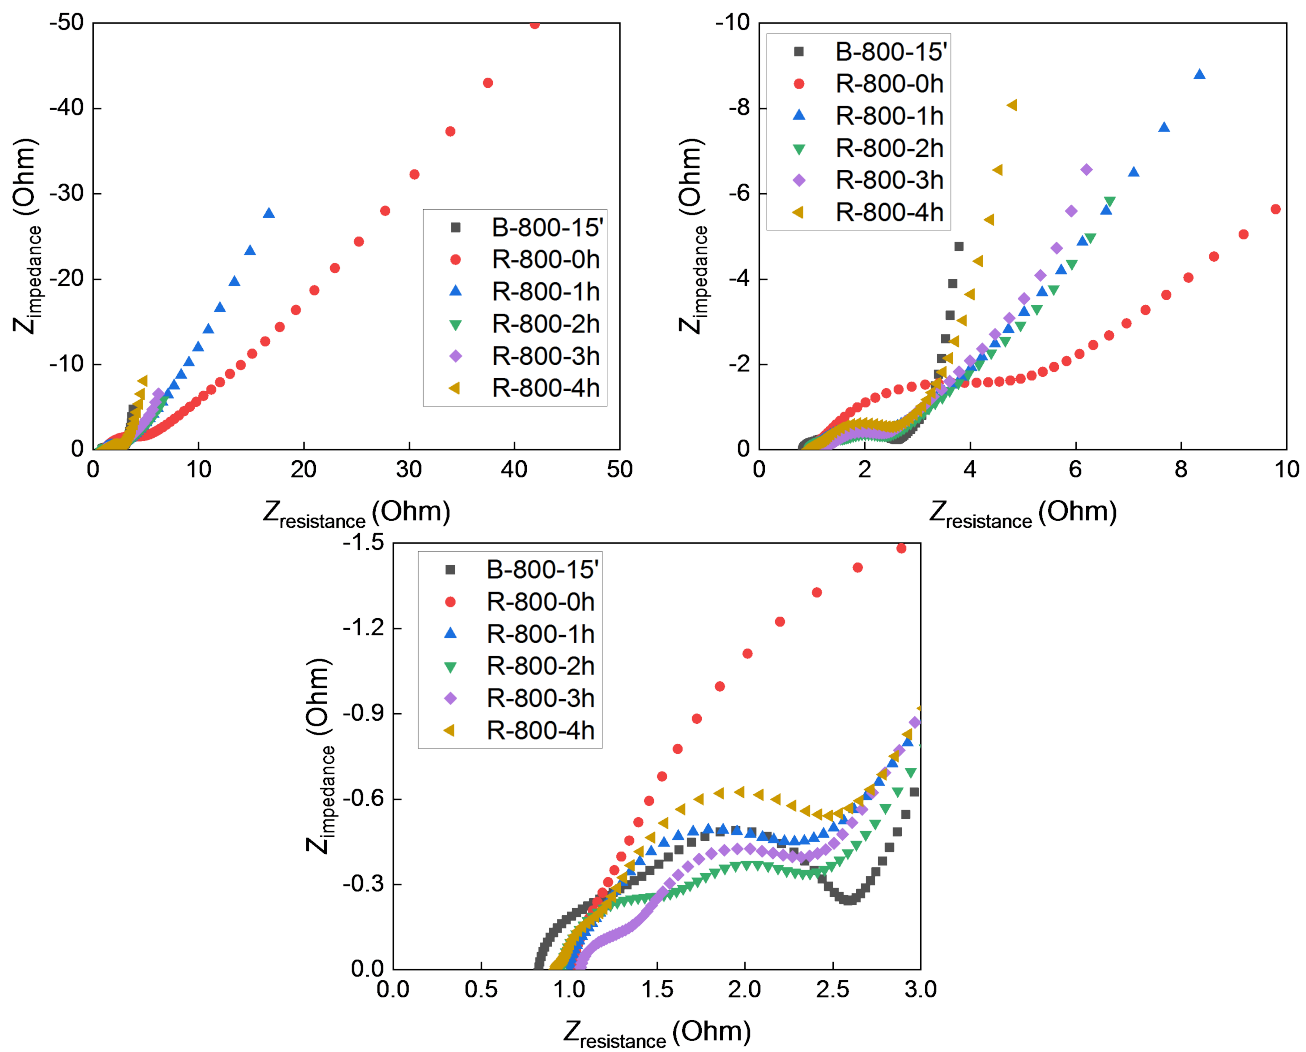

**Fig. S14** Nyquist plots of the obtained ELDC electrodes from activated carbon produced at 800°C



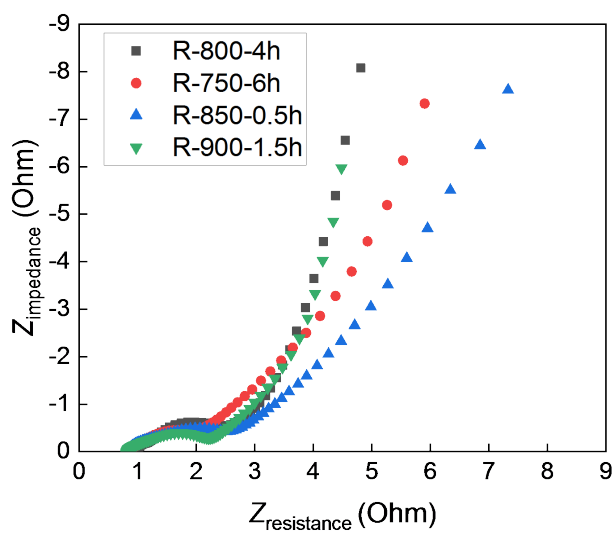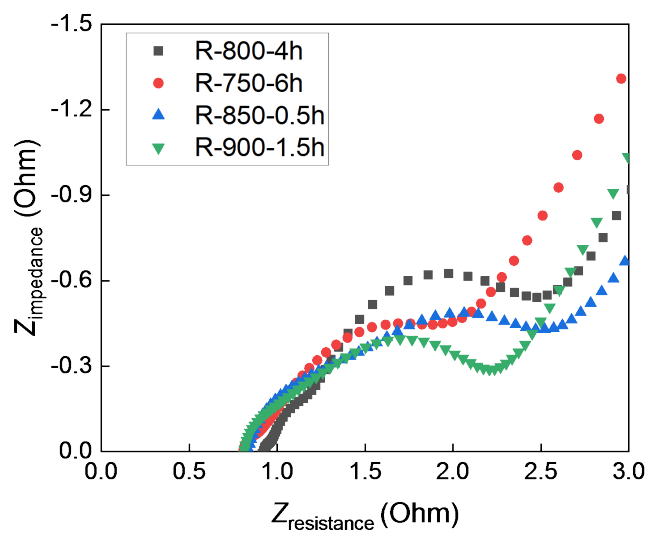

**Fig. S15** Nyquist plots of the obtain ELDC electrodes produced at different temperatures

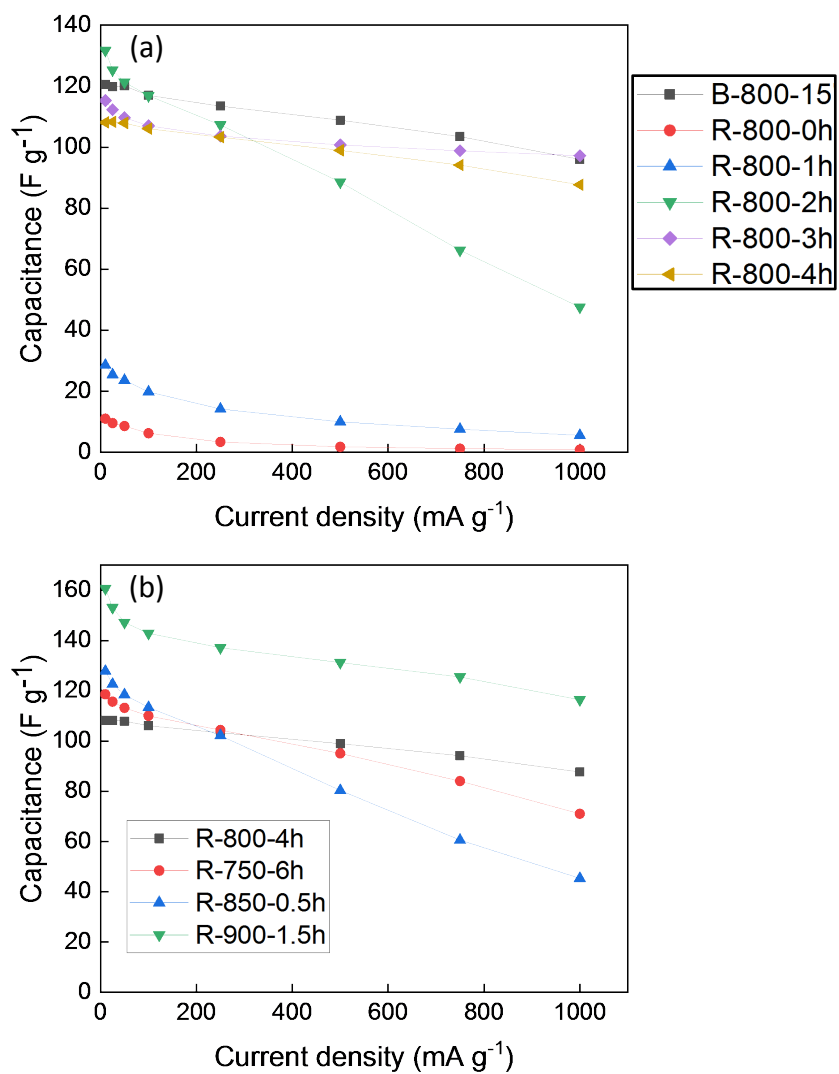

**Fig. S16** The capacitance values calculated from charge process of the samples.

**(a)** the samples produced at 800°C;

**(b)** the solid residues activated at different temperatures.

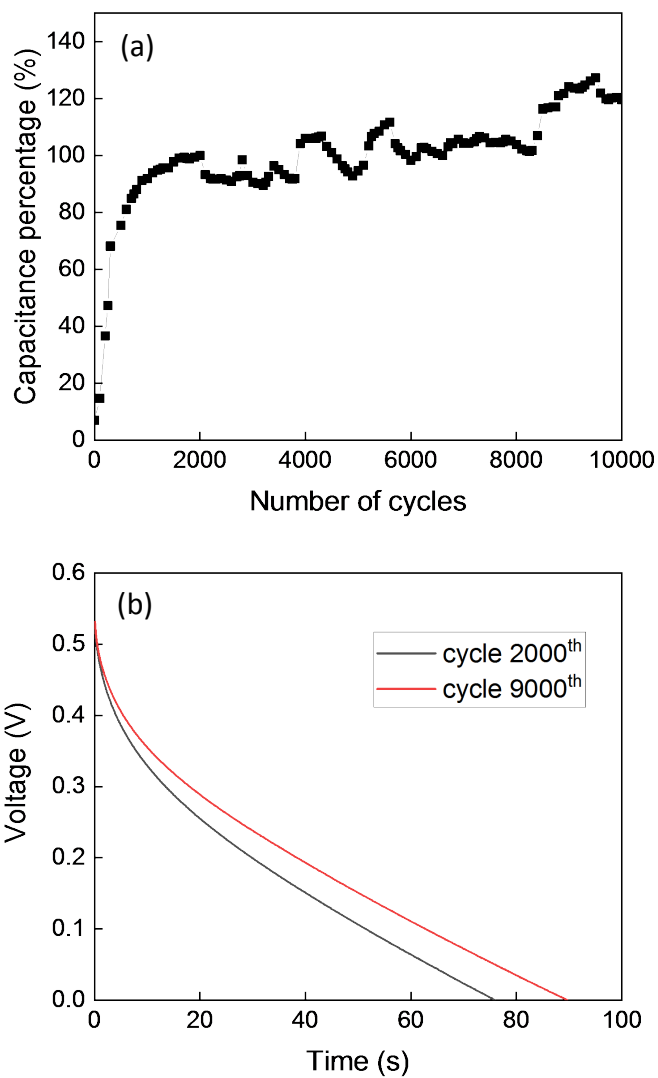

**Fig. S17 a)** The capacitance percentage of the electrode made from the solid residue activated for 3 hours at 800°C; **b)** The discharge profiles of this electrode at the 2000<sup>th</sup> and 9000<sup>th</sup> cycles
